# Supplementary material for: A concise flow synthesis of indole-3-carboxylic ester and its derivatisation to an auxin mimic
Source: publisher site journal article supplement (doi:10.3762/bjoc.13.251), 2017-11-29

## Supporting Information

for

# **A concise flow synthesis of indole-3-carboxylic ester and its derivatisation to an auxin mimic**

Marcus Baumann<sup>1</sup>, Ian R. Baxendale\*<sup>1</sup> and Fabien Deplante<sup>1</sup>

Address: <sup>1</sup>Department of Chemistry, University of Durham, South Road, Durham, Durham, DH1 3LE, UK

Email: Ian R. Baxendale - i.r.baxendale@durham.ac.uk

\* Corresponding author

## **Reproductions of <sup>1</sup>H and <sup>13</sup>C NMR spectra for the reported compounds**

### **Table of Contents:**

- |                          |    |
|--------------------------|----|
| 1. Copies of NMR spectra | S2 |
|--------------------------|----|

# 1. Copies of NMR spectra

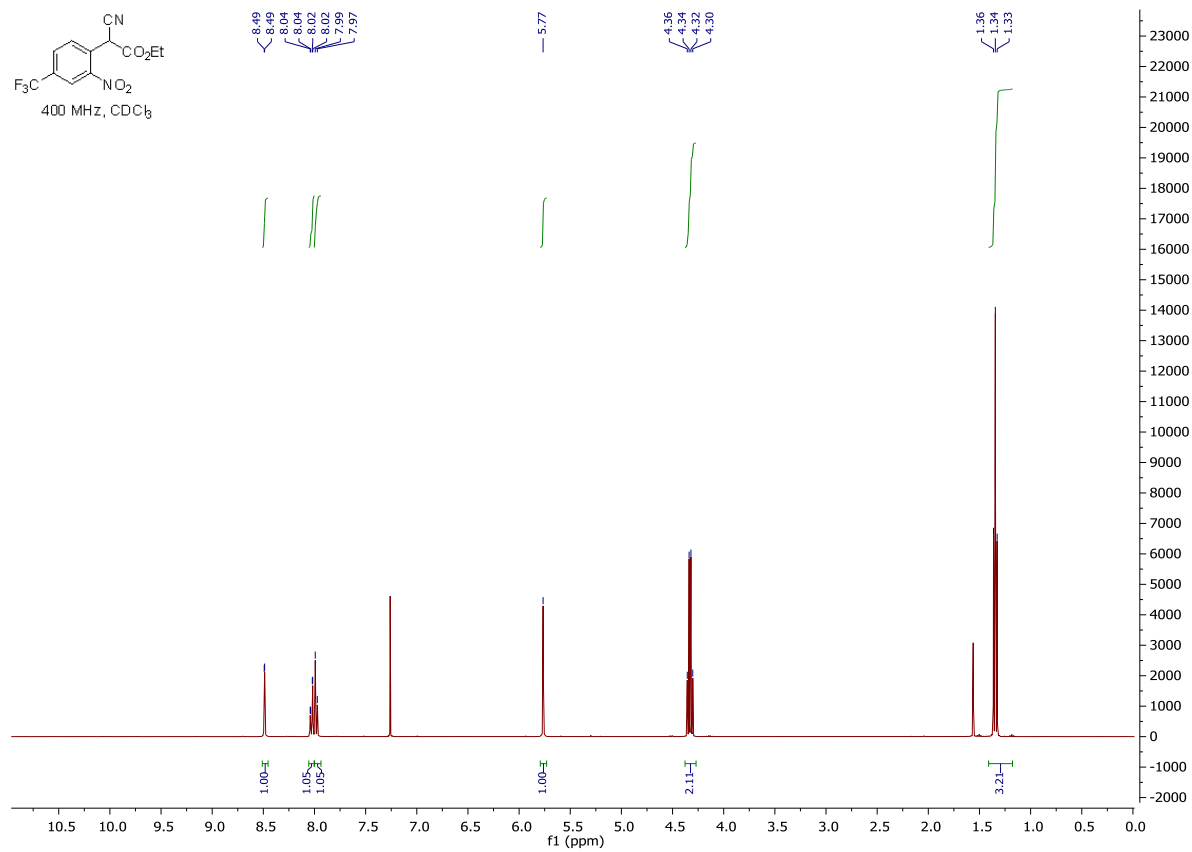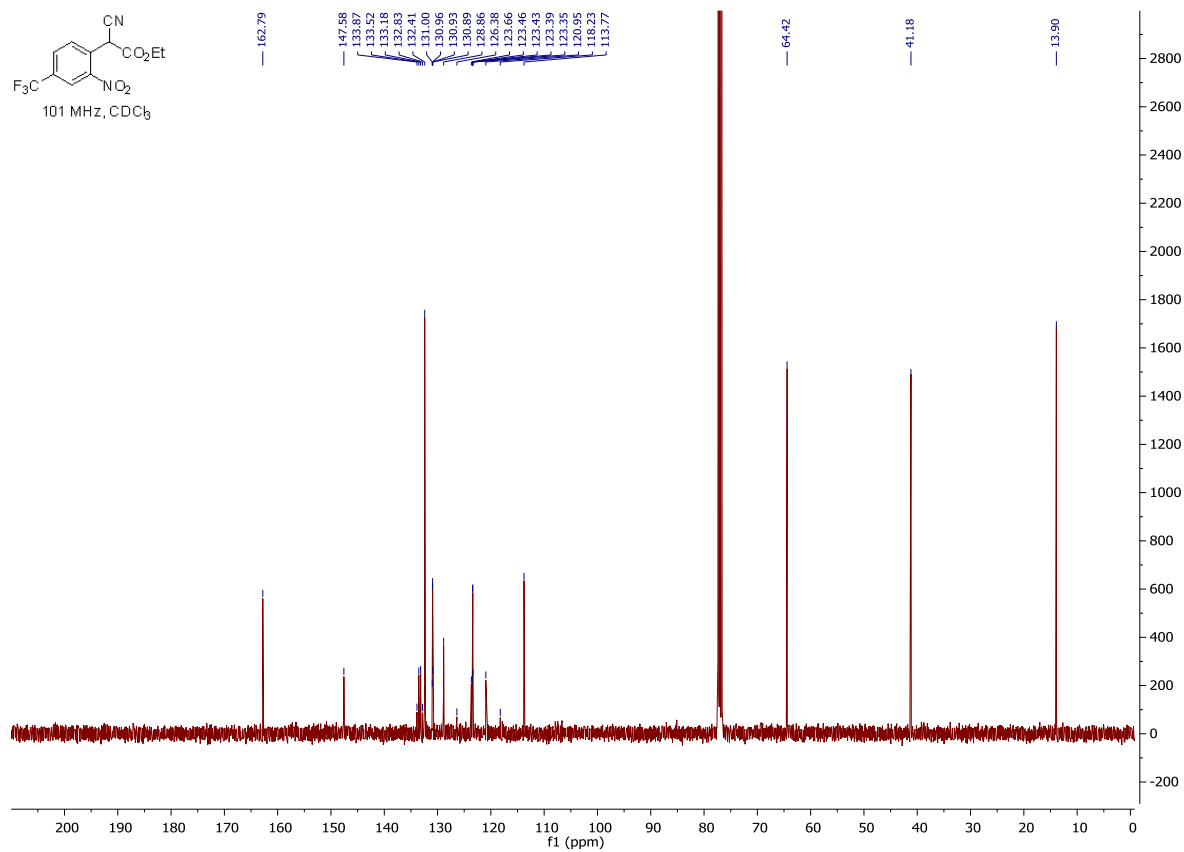

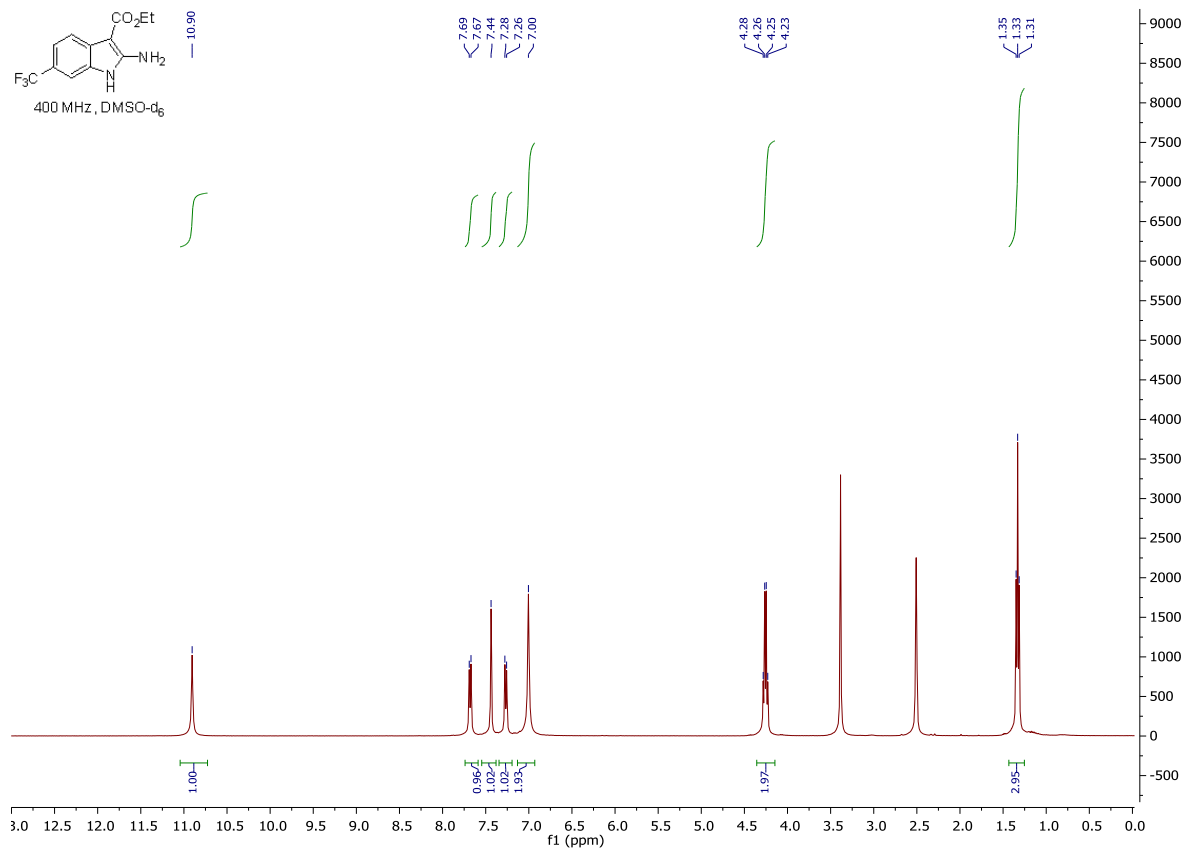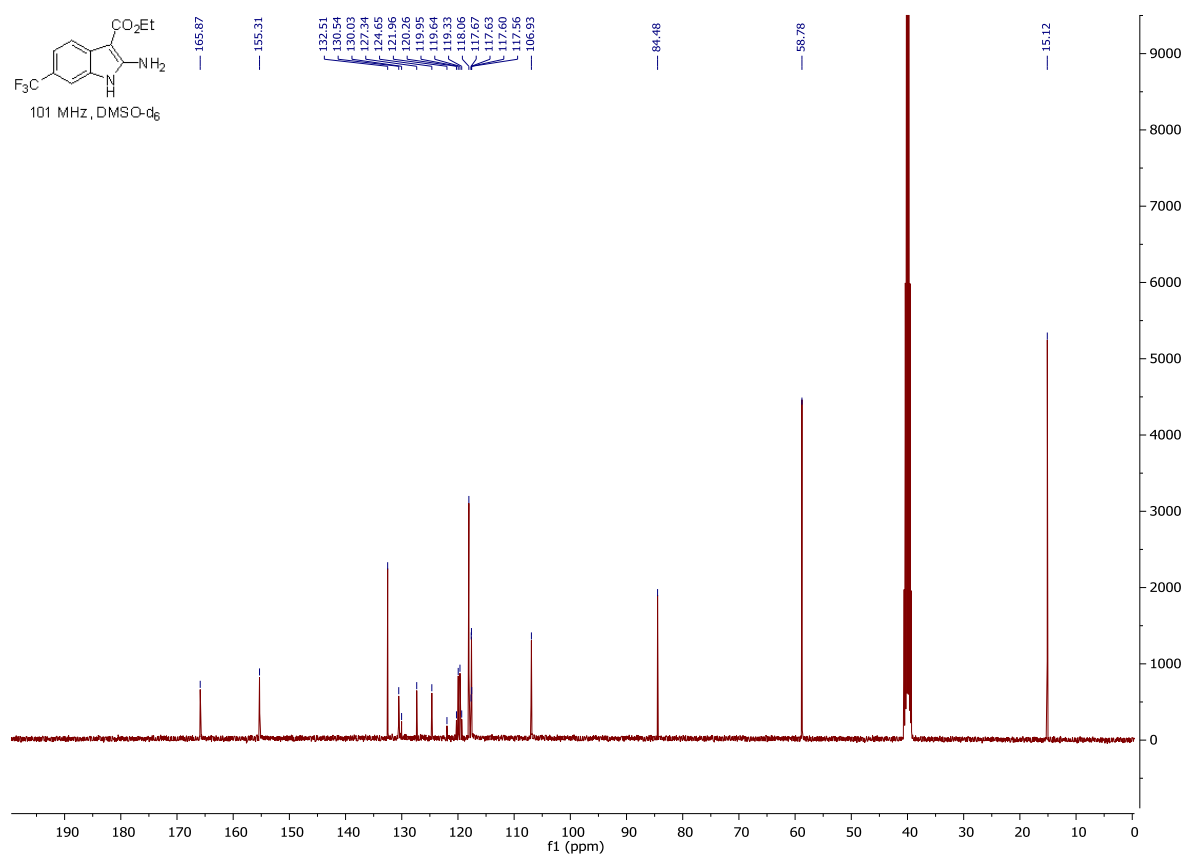

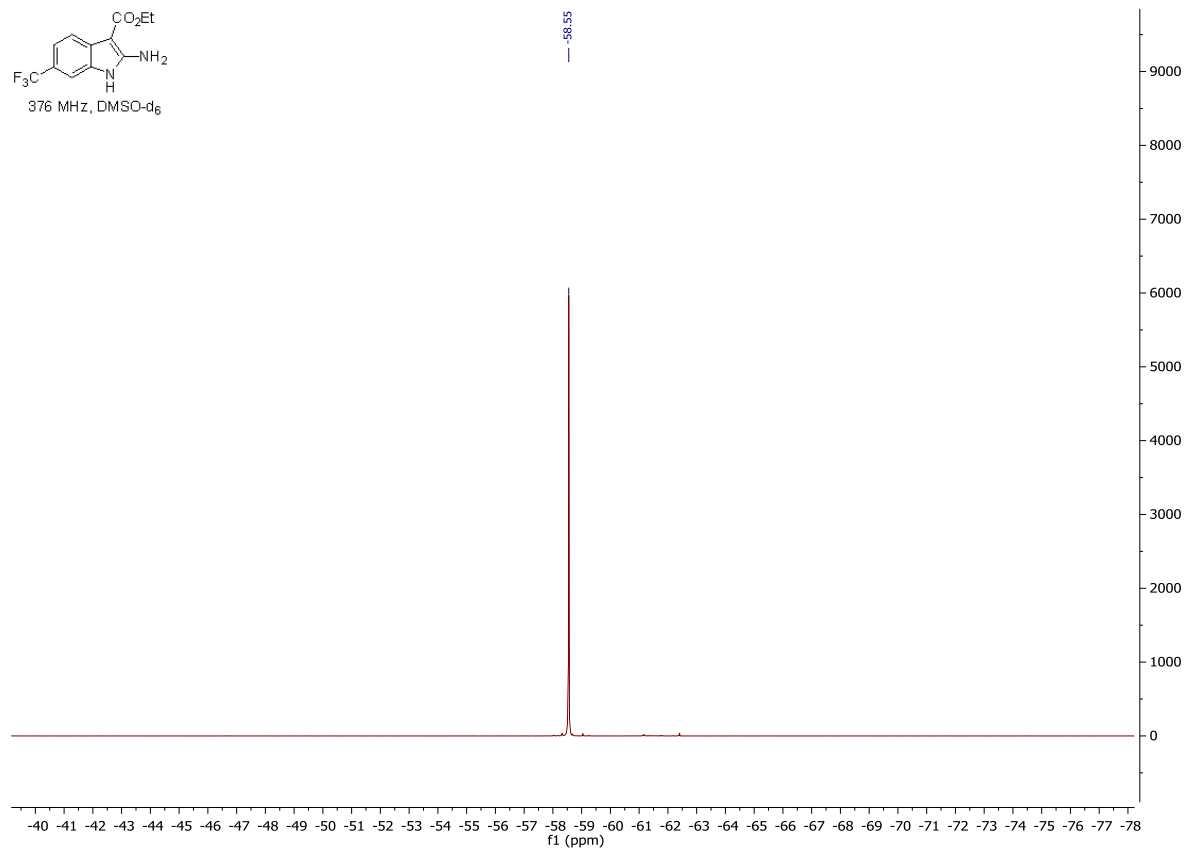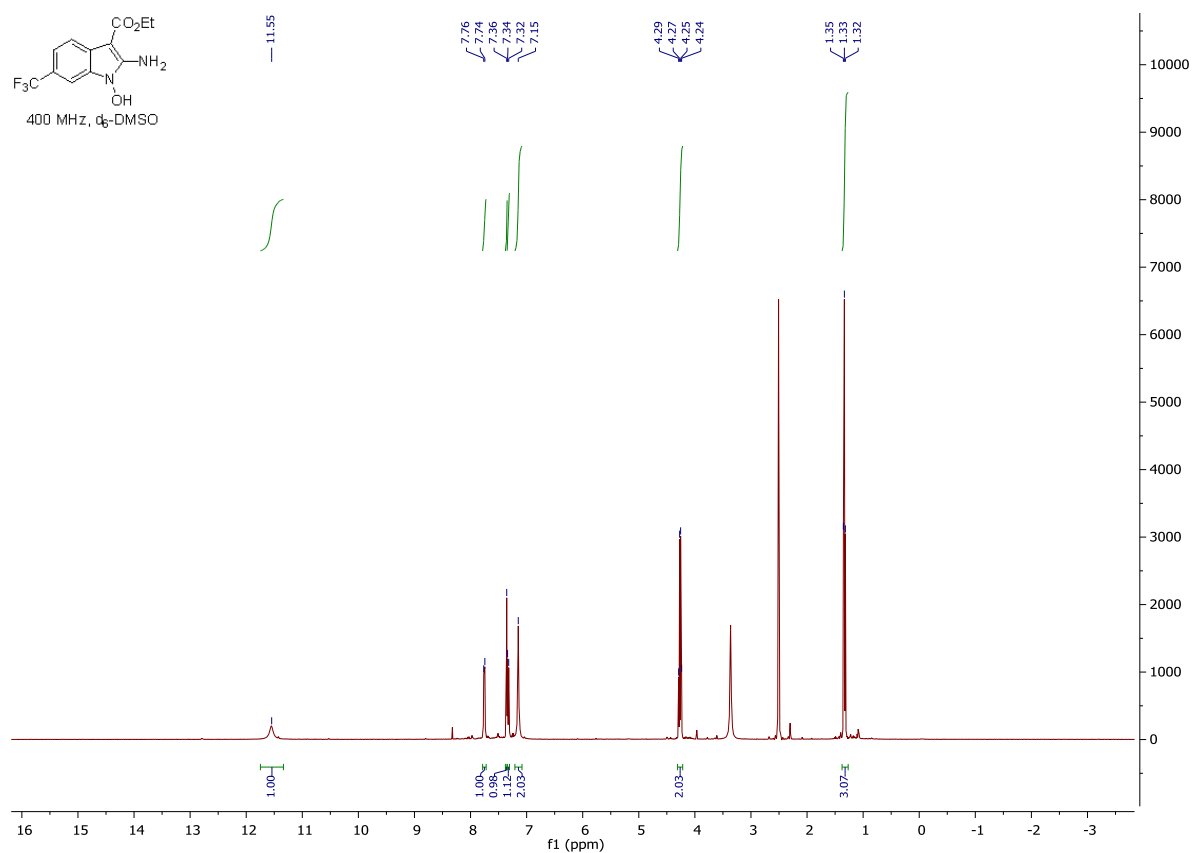

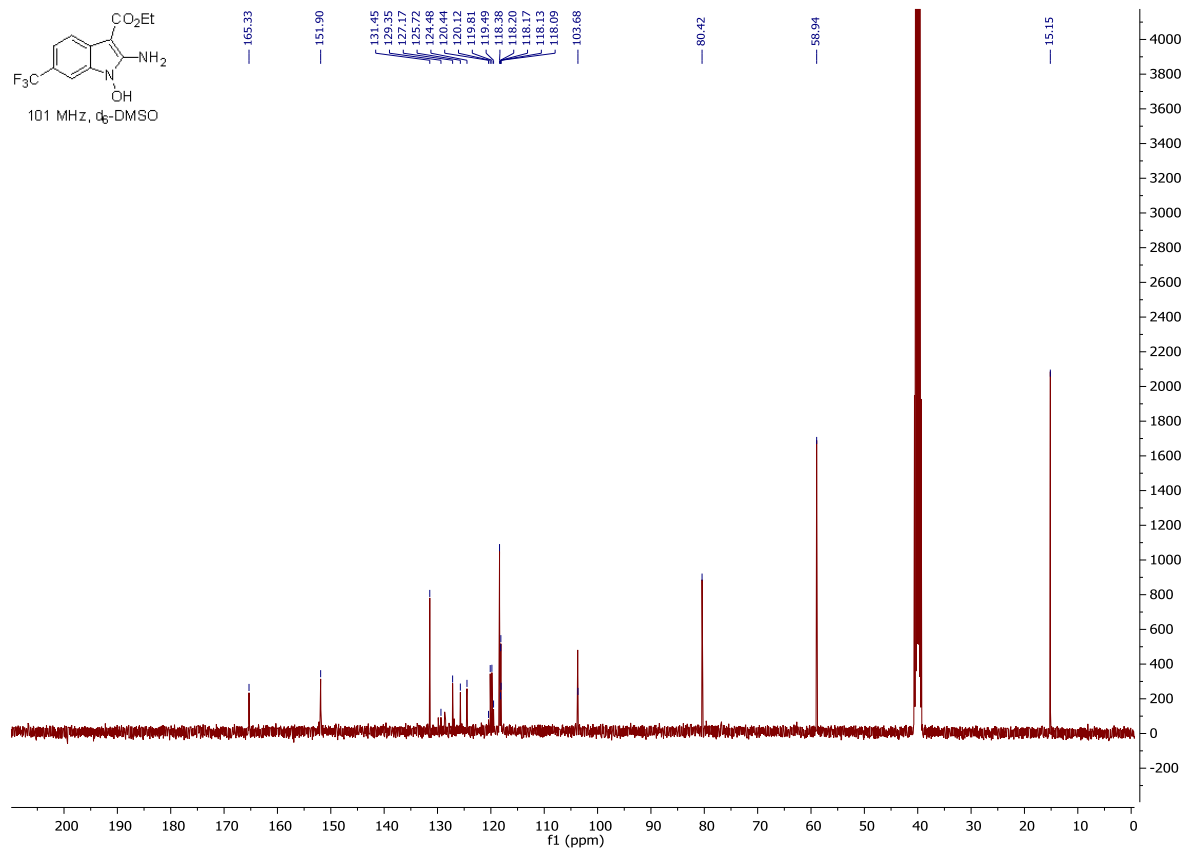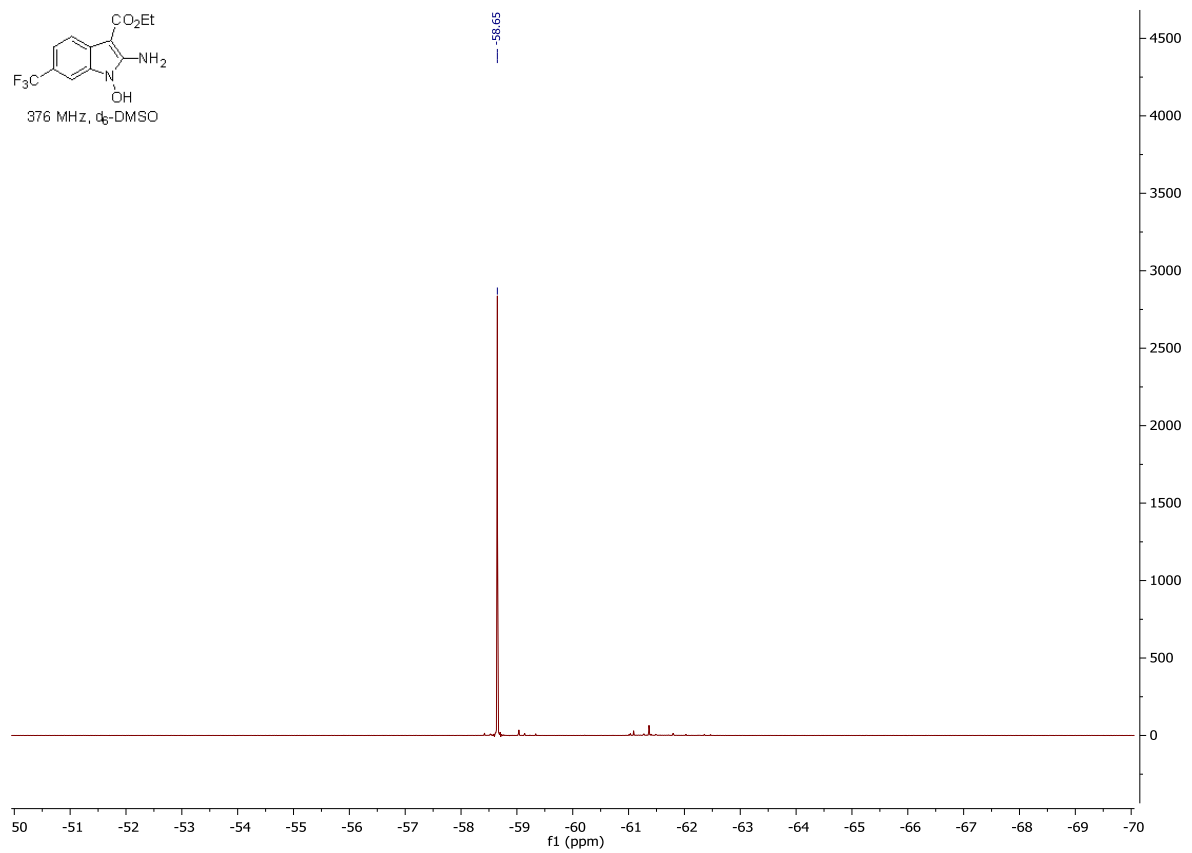

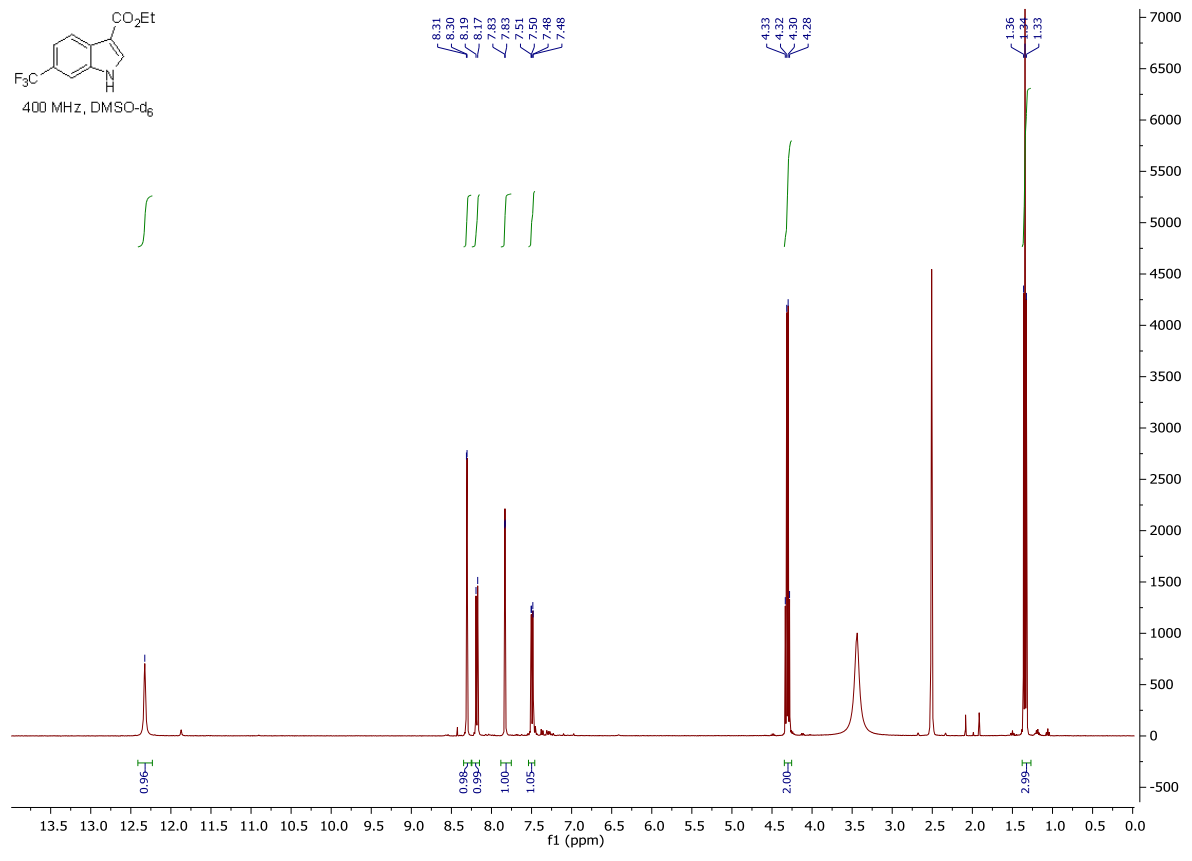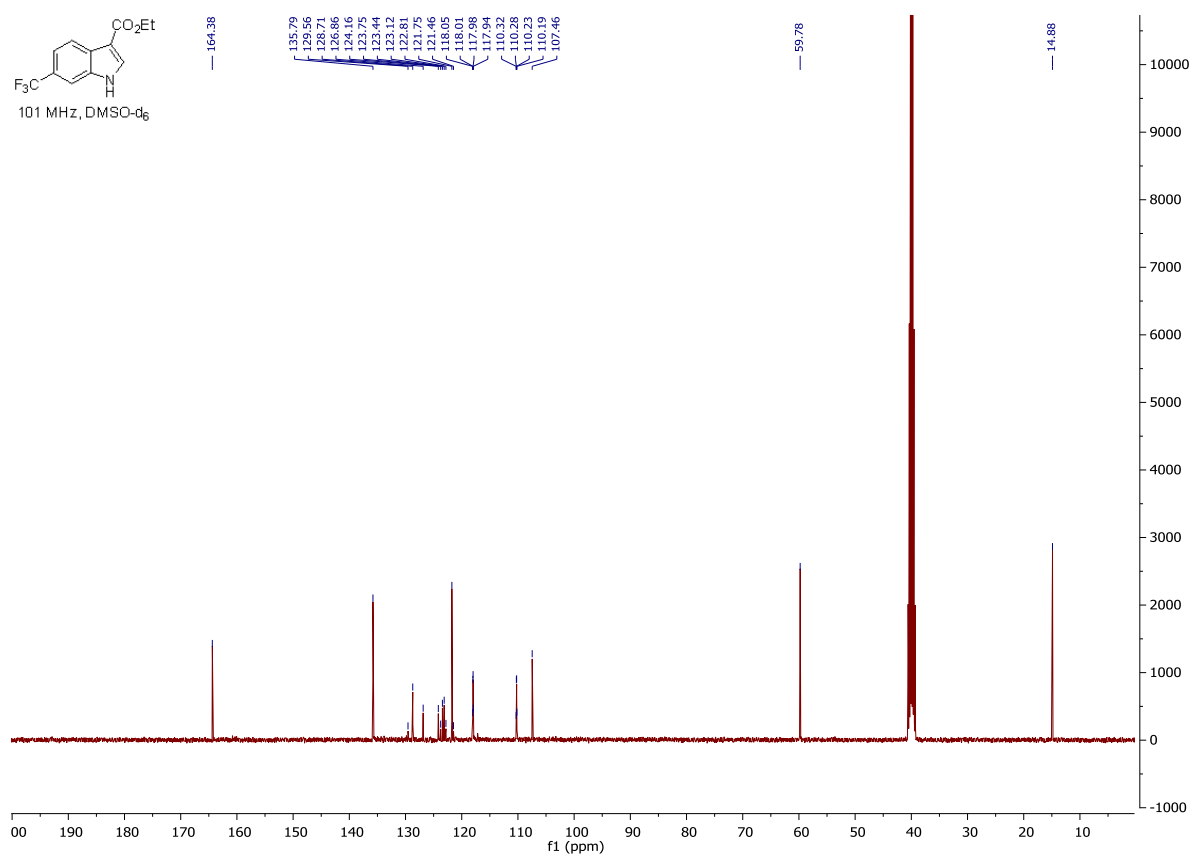

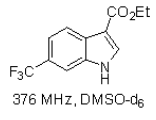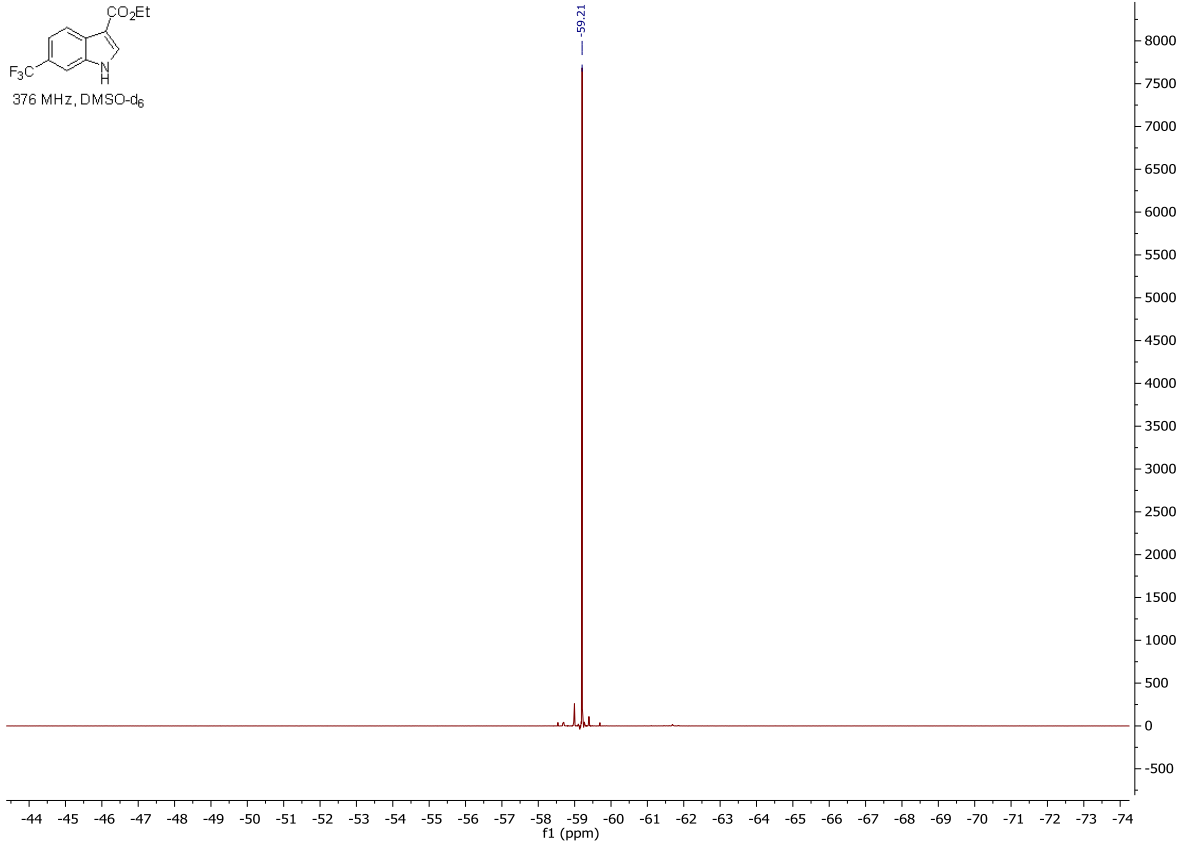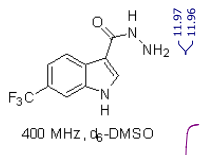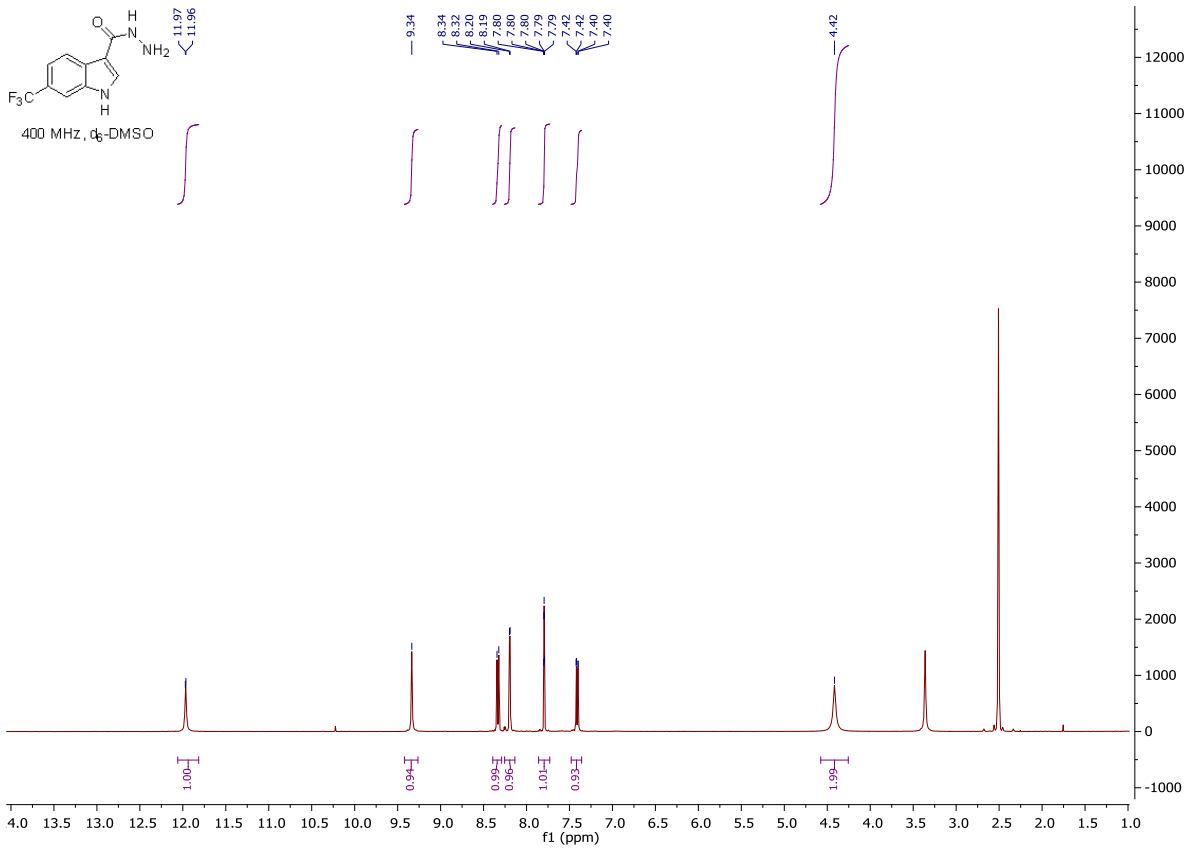

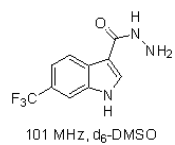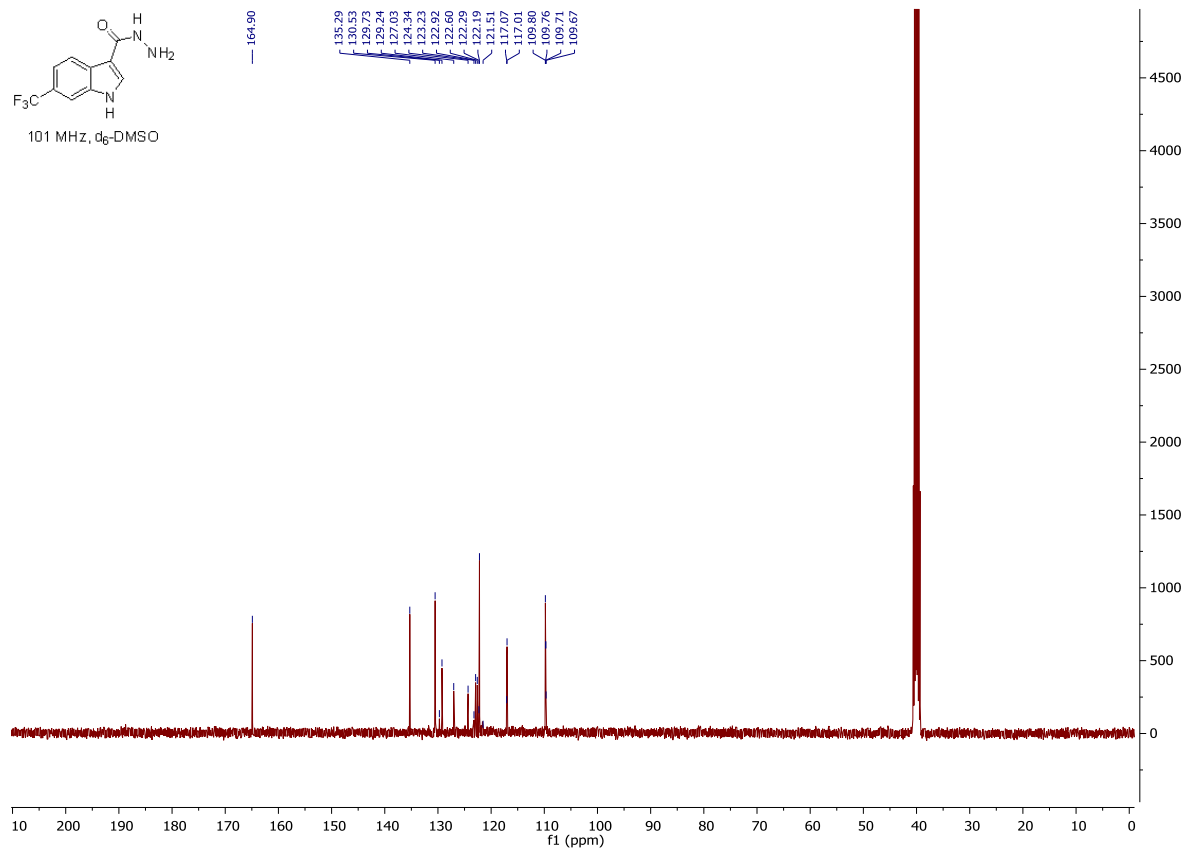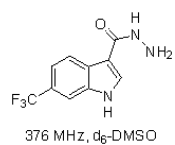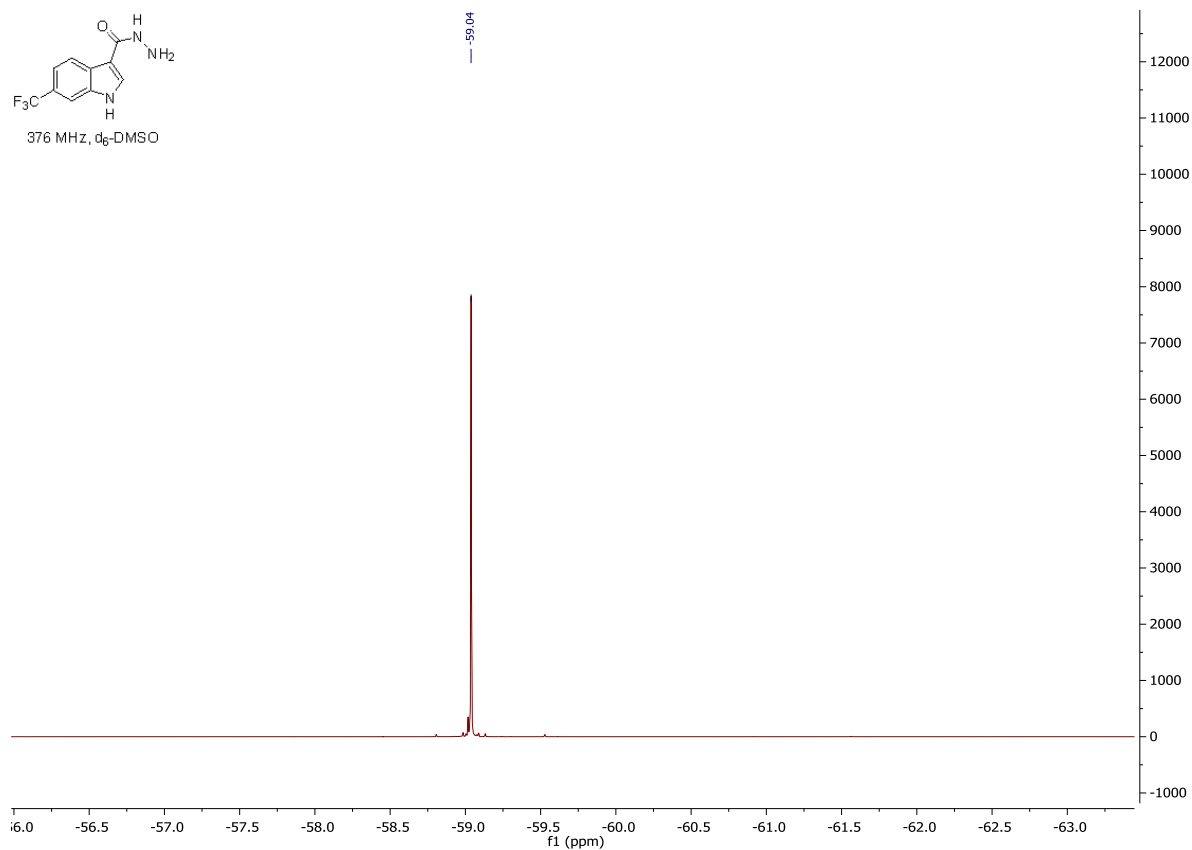



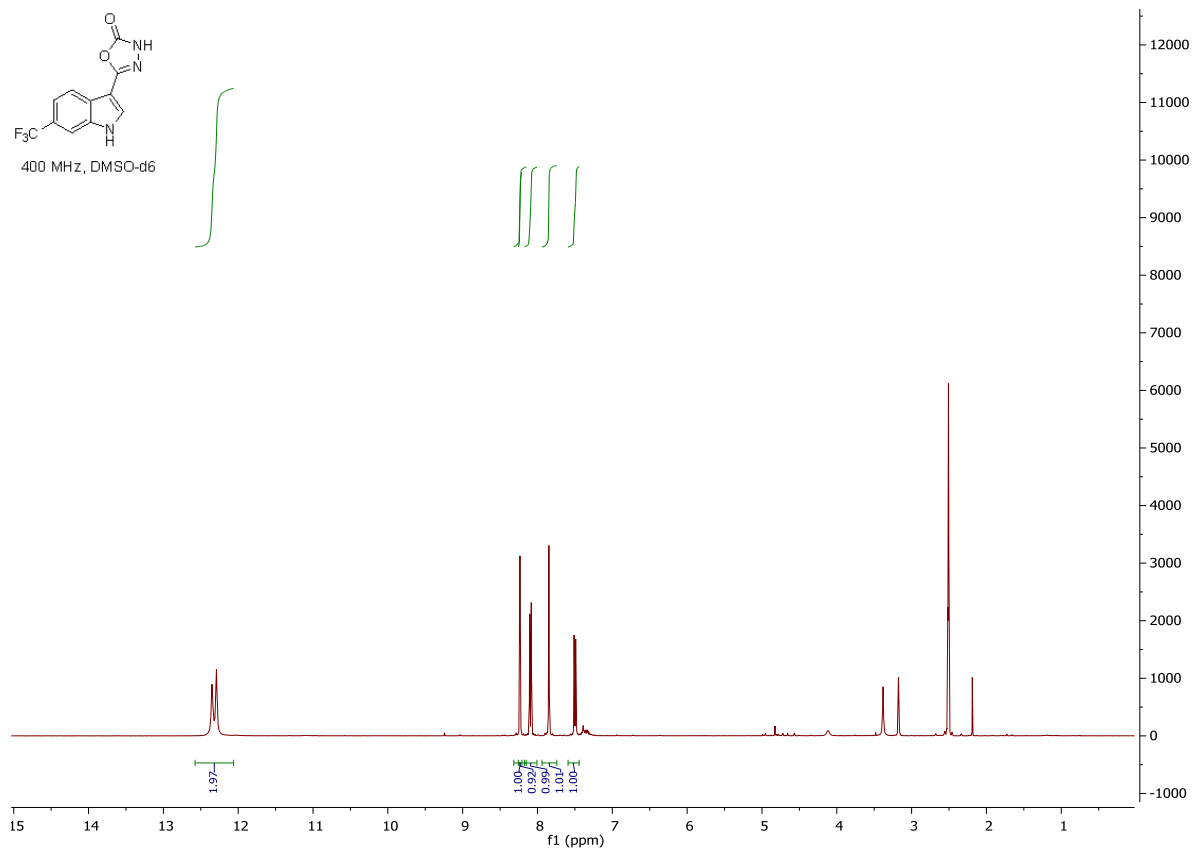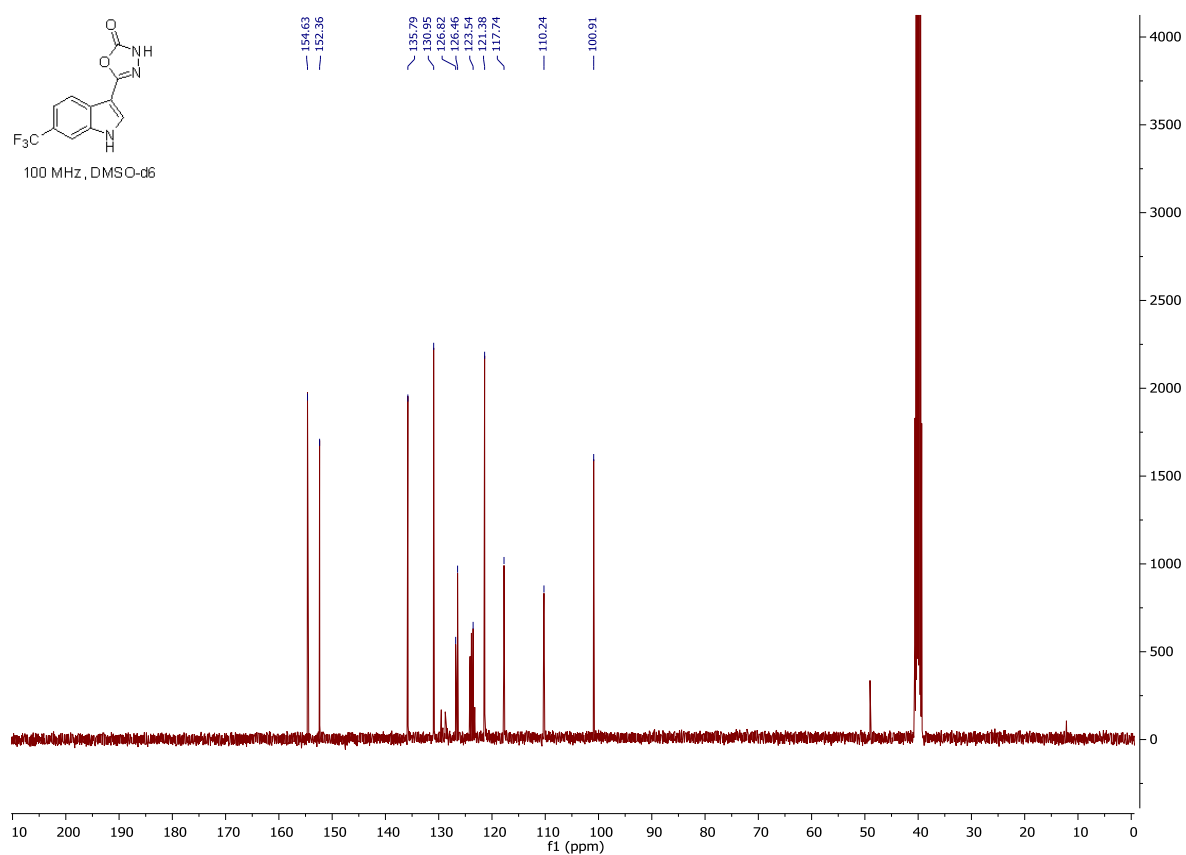

Supplement: Additional file 1 [file 1860-5397-13-251-S1.pdf]
